# Supplementary material for: Carob (Ceratonia siliqua) as Functional Feed Is Beneficial in Yellow Mealworm (Tenebrio molitor) Rearing: Evidence from Growth, Antioxidant Status and Cellular Responses
Source: MDPI journal article supplement (doi:10.3390/antiox11091840), 2022-09-19

**Figure S1:** Complete original immunoblots shown in Figure 6.

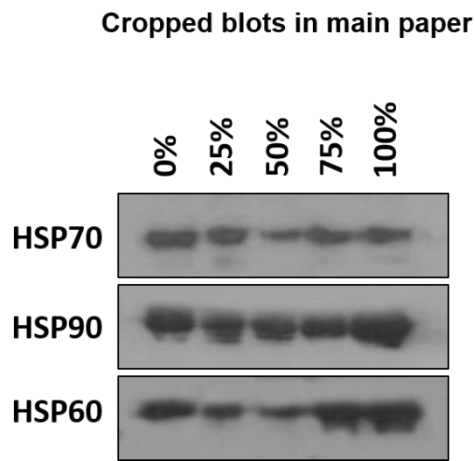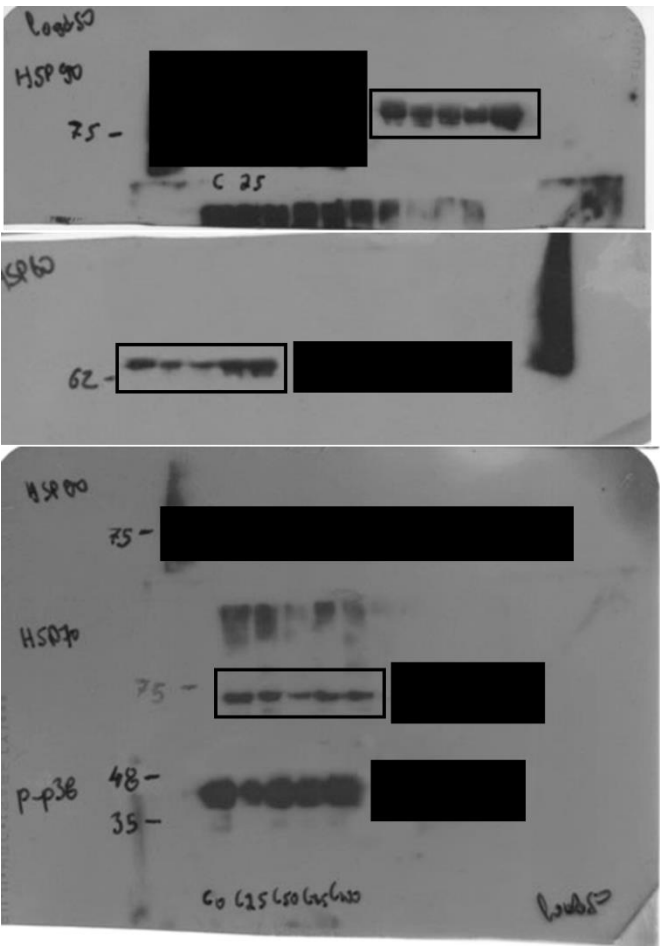

**Figure S2:** Complete original immunoblots shown in Figure 7.

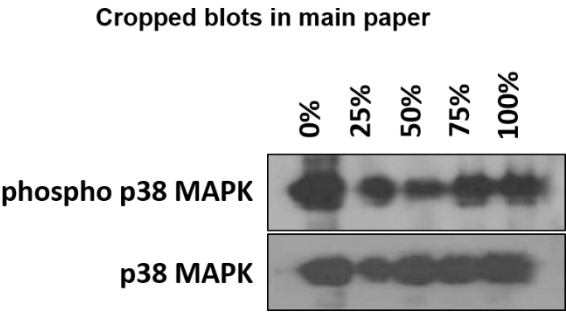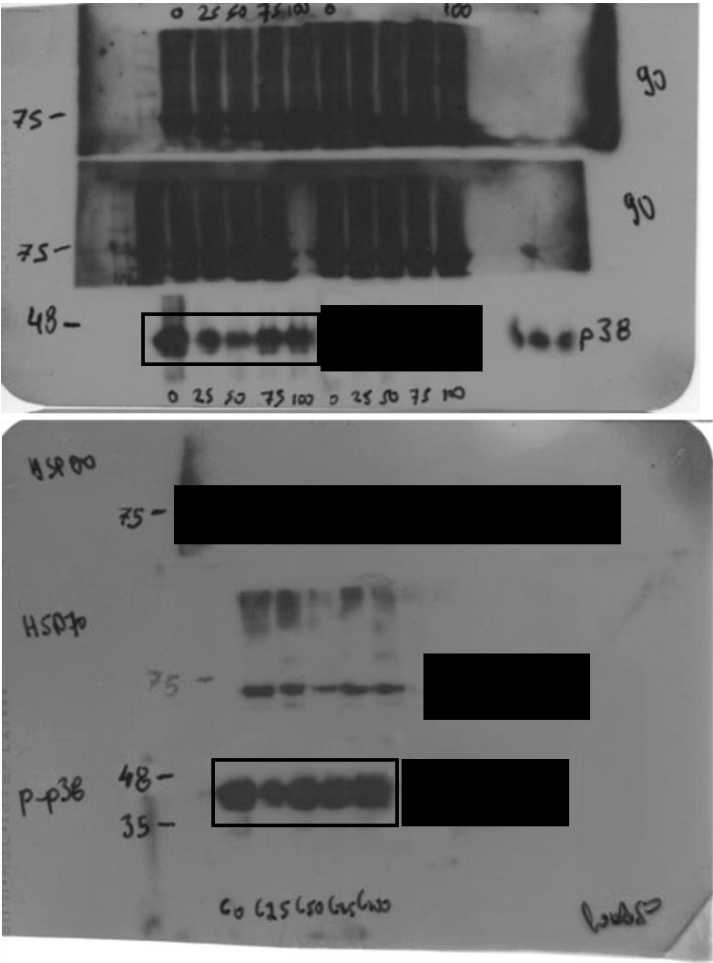

Cropped blots in main paper

0% 25% 50% 75% 100%

Bax

Bcl-2

35-  
28-

BAX 0 25 50 75 100 0

35-  
28-

Bcl-2

Bax

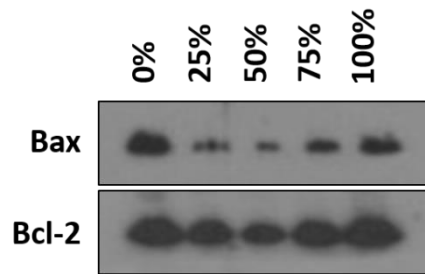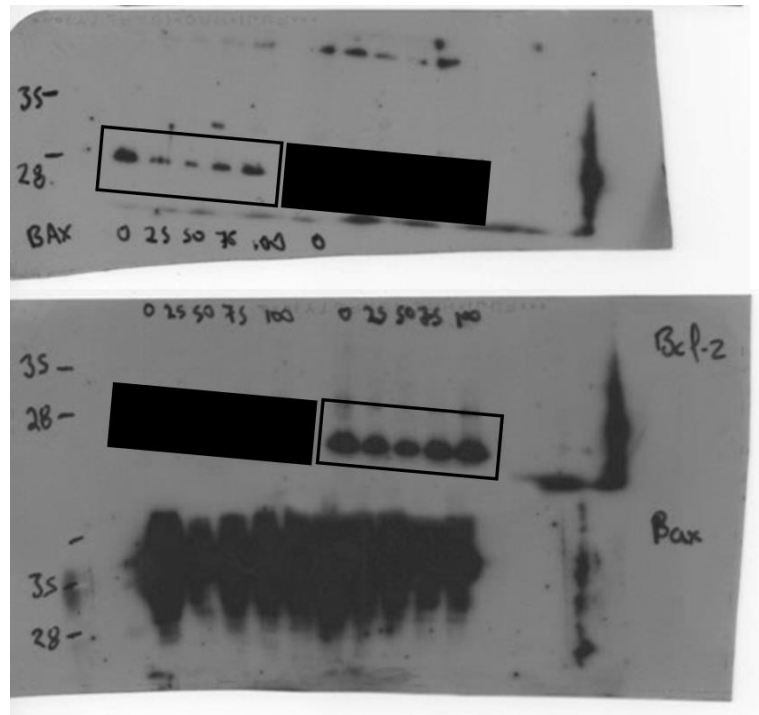

**Figure S4:** Complete original immunoblots shown in Figure 6, 7 and 8.

**Cropped blots in main paper**

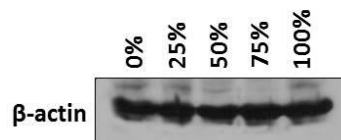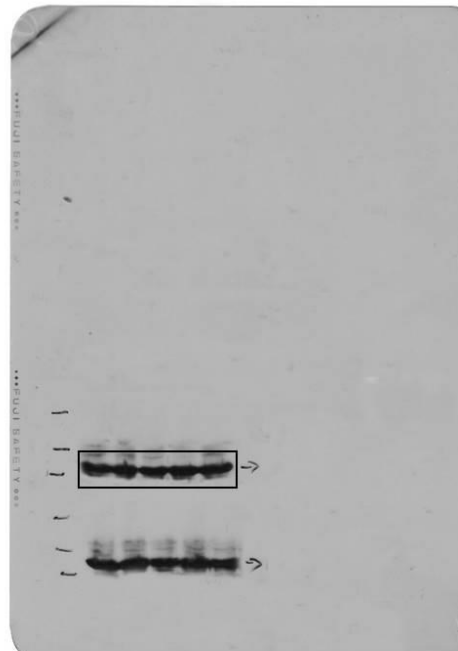

Supplement: s1 [file s1]
